# Supplementary material
Source: Springer Nature journal article supplement (https://www.springermedizin.de/resource/supplementary/12985_2011_2206_MOESM2_ESM.pdf/9606292)

**(a)****CXCL9 VALUE IN RESPONSE TO PEG-INTRON TREATMENT**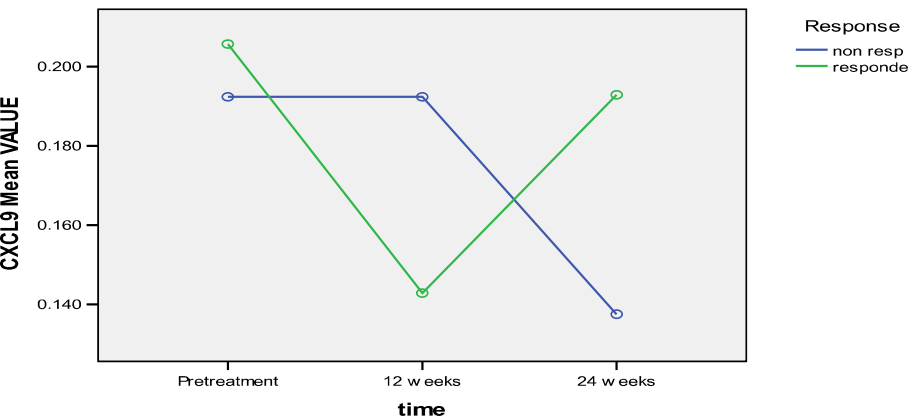**(b)****CXCL9 VALUE IN RESPONSE TO PEGASYS TREATMENT**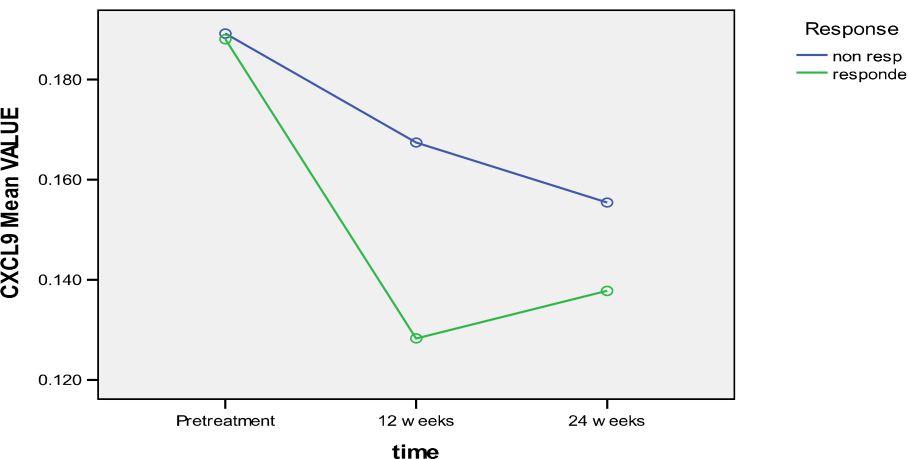

Supplement: MOESM2 [file 9606292]
